# Supplementary material for: Sulfur synchronously electrodeposited onto exfoliated graphene sheets as a cathode material for advanced lithium–sulfur batteries
Source: Royal Society of Chemistry journal article supplement (doi:10.1039/c5ta04609b), 2015-01-01
Supplement: c5ta04609b1.pdf [file c5ta04609b1.pdf]

## **Sulfur synchronously electrodeposited onto exfoliated graphene sheets as cathode material for advanced lithium-sulfur batteries**

Liyuan Zhang<sup>a</sup>, Hui Huang<sup>a,b,\*</sup>, Hailin Yin<sup>a</sup>, Yang Xia<sup>a,b</sup>, Jianmin Luo<sup>a</sup>, Chu Liang<sup>a,b</sup>,  
Yongping Gan<sup>a</sup>, Xinyong Tao<sup>c</sup>, Wenkui Zhang<sup>a,\*</sup>

<sup>a</sup> *College of Materials Science and Engineering, Zhejiang University of Technology, Hangzhou 310014, China*

<sup>b</sup> *State Key Lab of Silicon Materials & Department of Materials Science and Engineering, Hangzhou 310027, China Zhejiang University*

<sup>c</sup> *Department of Materials Science and Engineering, Stanford University, Stanford, California 94305, United States*

\*Corresponding authors. E-mail address: [msechem@zjut.edu.cn](mailto:msechem@zjut.edu.cn)

## Supporting Information

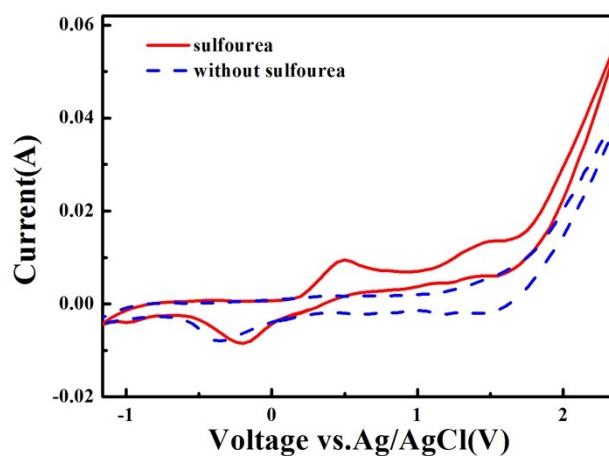

Figure S1. Cyclic voltammetry curves of graphite electrode in the electrolytes with or without addition of sulphourea at a scan rate of  $5 \text{ mV s}^{-1}$ .

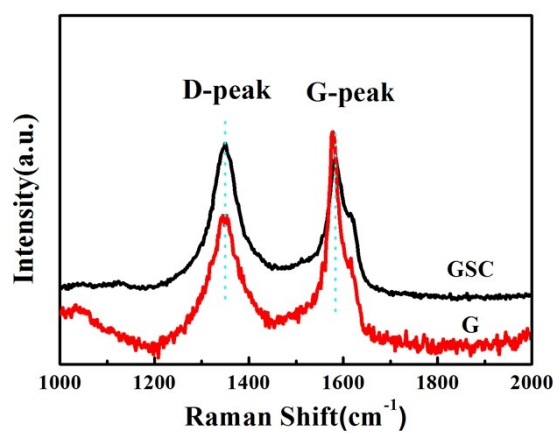

Figure S2. Raman spectra of the as-prepared GSC and graphene samples.

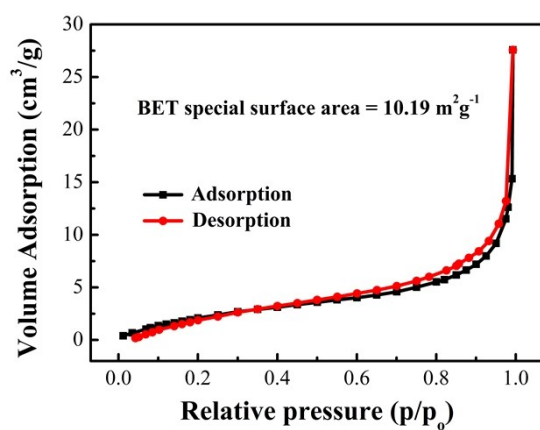

Figure S3. Nitrogen adsorption-desorption isotherms of GSC.

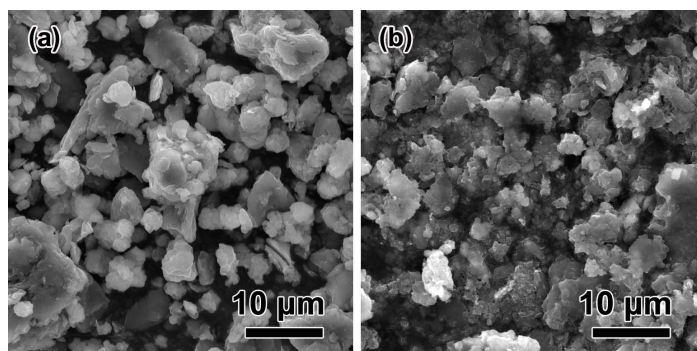

Figure S4. SEM image of GSC: (a) before cycling and (b) after 200 cycles at 5 A g<sup>-1</sup>.
